# Supplementary material for: Oral ecological environment modifications by hard-cheese: from pH to microbiome: a prospective cohort study based on 16S rRNA metabarcoding approach
Source: Springer Nature journal article supplement (doi:10.1186/s12967-022-03506-4), 2022-07-09
Supplement: MOESM1 [file 23253504]

Additional Table 1

GP Cheese NUTRITIONAL INFORMATION

| Average nutritional values | Per 100 gr           | % RI (*) per 100 g |
|----------------------------|----------------------|--------------------|
| Energy                     | 1597 kJ / 384 kcal   | 19                 |
| Fat                        | 28 gr                | 40                 |
| - of which saturates       | 18 gr                | 90                 |
| Carbohydrate               | 0 gr                 | 0                  |
| Fibre                      | 0 gr                 |                    |
| Protein                    | 33 gr                | 66                 |
| Salt                       | 1,8 gr               | 29                 |
| Vitamin A                  | 224 µg (28% NRV**)   |                    |
| Riboflavin                 | 0,36 mg (26% NRV**)  |                    |
| Vitamin B12                | 3 µg (120% NRV**)    |                    |
| Calcium                    | 1165 mg (146% NRV**) |                    |
| Phosphorus                 | 692 mg (99% NRV**)   |                    |
| Magnesium                  | 63 mg (17% NRV**)    |                    |
| Zinc                       | 11 mg (110% NRV**)   |                    |
| Copper                     | 0,5 mg (50% NRV**)   |                    |
| Selenium                   | 12 µg (22% NRV**)    |                    |
| Iodine                     | 35,5 µg (24% NRV**)  |                    |
| Arginine                   | 820 mg               |                    |

(\*) Reference Intake (RI) of an average adult (8 400 kJ/ 2 000 kcal)

(\*\*) Nutrient Reference Value
